# Supplementary material
Source: PubMed Central journal article supplement (PMC5111828)

Supporting Information for:

**Protein Cross-Linking Capillary Electrophoresis for Protein-Protein Interaction Analysis**

Claire M. Ouimet<sup>†</sup>, Hao Shao<sup>§</sup>, Jennifer N. Rauch<sup>§</sup>, Mohamed Dawod<sup>†</sup>, Bryce Nordhues<sup>||</sup>, Chad A. Dickey<sup>||</sup>, Jason E. Gestwicki<sup>§</sup>, Robert T. Kennedy<sup>†,‡,\*</sup>

<sup>§</sup>Department of Pharmaceutical Chemistry and the Institute for Neurodegenerative Disease, 675 Nelson Rising Ln, University of California at San Francisco, San Francisco, California 94158, United States

<sup>||</sup>Department of Molecular Medicine, University of South Florida, 4001 E. Fletcher Ave., MDC 36, Tampa, Florida 33613, United States

<sup>†</sup>Department of Chemistry, University of Michigan  
930 N. University Ave, Ann Arbor, Michigan, 48109, United States

<sup>‡</sup>Department of Pharmacology, University of Michigan  
1150 W. Medical Center Dr., Ann Arbor, Michigan, 48109, United States

\*Corresponding author

E-mail: [rtkenn@umich.edu](mailto:rtkenn@umich.edu)

Tel: 734-615-4363

Fax: 745-615-6462

## **Supporting Information:**

**Figure S-1.** Free solution electrophoresis of chaperone complexes Hsp70-488-Bag3 and Hsp90-488 homodimer.

**Table S-1.** Quantitation of resolution of free proteins and protein complexes.

**Figure S-2.** Capillary gel electrophoresis of lysozyme immunocomplex.

**Table S-2.** Dependence of Hsp70-488-Bag3 complex detected on concentration of formaldehyde and cross-linking reaction time.

**Table S-3.** Dependence of Hsp90-488 complex detected on concentration of formaldehyde and cross-linking reaction time.

**Table S-4.** Dependence of FITC-lysozyme-antibody complex detected on concentration of formaldehyde and cross-linking reaction time.

**Figure S-3.** Saturation binding assays for Hsp70-488-Bag3 at different 1% formaldehyde reaction times.

**Table S-5.** Dependence of measured  $K_d$  of Hsp70-488-Bag3 interaction on cross-linking reaction time using 1% formaldehyde.

**Figure S-4.** Calorimetric isothermal-titration measurement of FITC-lysozyme interaction with anti-lysozyme.

**Figure S-5.** FCPIA data of small molecule Hsp70-488-Bag3 inhibitors JG-98, JG-231 and JG-311.

**Figure S-1.** Free solution electrophoresis of chaperone complexes Hsp70-488-Bag3 (A) and Hsp90-488 homodimer (B). The electrophoresis buffer was 10 mM, pH 10 borate.

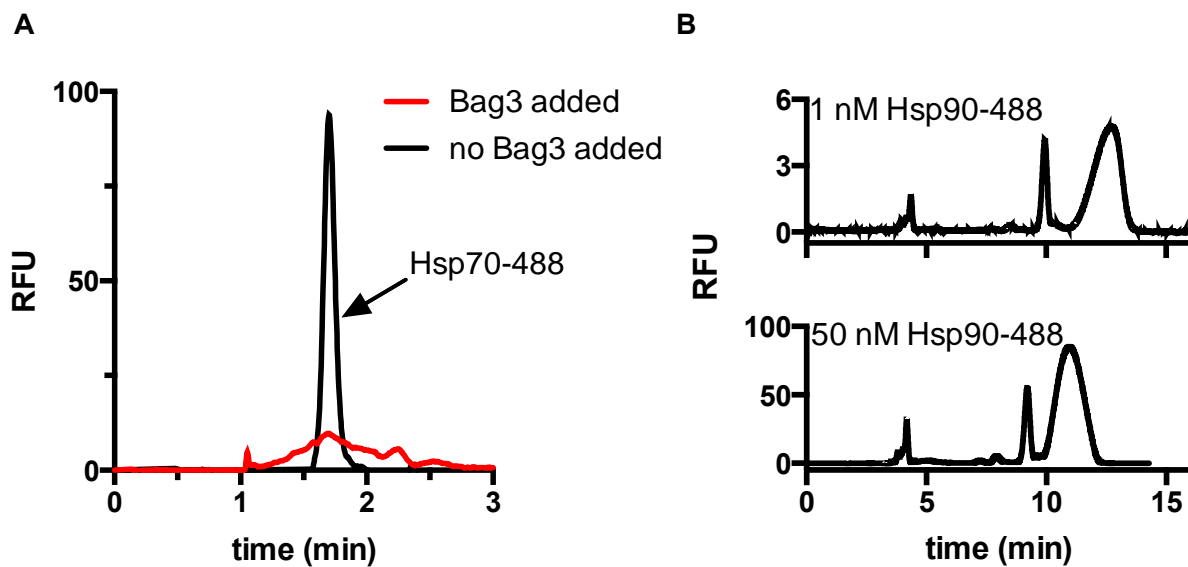

**Table S-1.** Resolution of free proteins from protein complexes.

| <b>Complex</b>         | <b>Resolution</b> |
|------------------------|-------------------|
| Hsp70-Bag3             | 1.0               |
| Hsp90 homodimer        | 2.0               |
| Lysozyme-anti-lysozyme | 1.1               |

**Figure S-2.** Capillary gel electrophoresis separation of FITC-lysozyme immunocomplex.

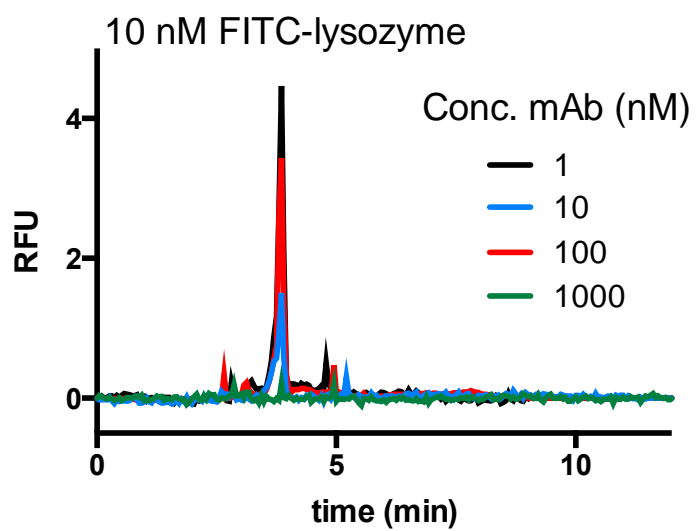

**Table S-2.** Dependence of 25 nM Hsp70-488 and 100 nM Bag3 on Hsp70-Bag3 complex detected on concentration of formaldehyde and cross-linking reaction time. Error is range of two trials.

| Percent complex (%)               |                     |         |         |        |         |
|-----------------------------------|---------------------|---------|---------|--------|---------|
| formaldehyde concentration (%w/v) | Reaction time (min) |         |         |        |         |
|                                   | 0.5                 | 5       | 10      | 30     | 60      |
| <b>0.050</b>                      | 20 ± 3              | 21 ± 8  | 30 ± 17 | 38 ± 3 | 29 ± 6  |
| <b>0.50</b>                       | 19 ± 5              | 40 ± 13 | 60 ± 9  | 74 ± 9 | 46 ± 13 |
| <b>1.0</b>                        | 22 ± 9              | 46 ± 24 | 73 ± 10 | 73 ± 6 | 24 ± 3  |
| <b>2.5</b>                        | 31 ± 2              | 62 ± 17 | 73 ± 2  | 75 ± 8 | 44 ± 5  |

**Table S-3.** Dependence of 50 nM Hsp90-488 on complex detected on concentration of formaldehyde and cross-linking reaction time. Error is range of two trials.

| Percent complex (%)               |                     |         |            |            |
|-----------------------------------|---------------------|---------|------------|------------|
| formaldehyde concentration (%w/v) | Reaction time (min) |         |            |            |
|                                   | 0.5                 | 5       | 10         | 60         |
| <b>0.050</b>                      | 80 ± 5              | 77 ± 1  | 81.2 ± 0.4 | 71.4 ± 0.9 |
| <b>0.50</b>                       | 77 ± 5              | 74 ± 6  | 73.3 ± 0.6 | 74.6 ± 0.8 |
| <b>1.0</b>                        | 73 ± 2              | 79 ± 10 | 72 ± 3     | 73 ± 6.5   |
| <b>2.5</b>                        | 78 ± 6              | 73 ± 7  | 64 ± 4     | 58 ± 4     |

**Table S-4.** Dependence of 10 nM FITC-lysozyme and 20 nM antibody on complex detected on concentration of formaldehyde and cross-linking reaction time. Error is range of two trials.

| Percent complex (%)               |                     |        |         |         |
|-----------------------------------|---------------------|--------|---------|---------|
| formaldehyde concentration (%w/v) | Reaction time (min) |        |         |         |
|                                   | 0.5                 | 5      | 10      | 60      |
| <b>0.050</b>                      | 27 ± 15             | 39 ± 1 | 34 ± 7  | 24 ± 3  |
| <b>0.50</b>                       | 33 ± 15             | 37 ± 8 | 37 ± 12 | 39 ± 11 |
| <b>1.0</b>                        | 39 ± 15             | 35 ± 1 | 40 ± 9  | 34 ± 11 |
| <b>2.5</b>                        | 42 ± 24             | 27 ± 8 | 28 ± 12 | 23 ± 4  |

**Figure S-3.** Saturation binding assays for Hsp70-488-Bag3 at different 1% formaldehyde reaction times. All samples contain 25 nM Hsp70-488, error bars are standard deviation (n = 3).

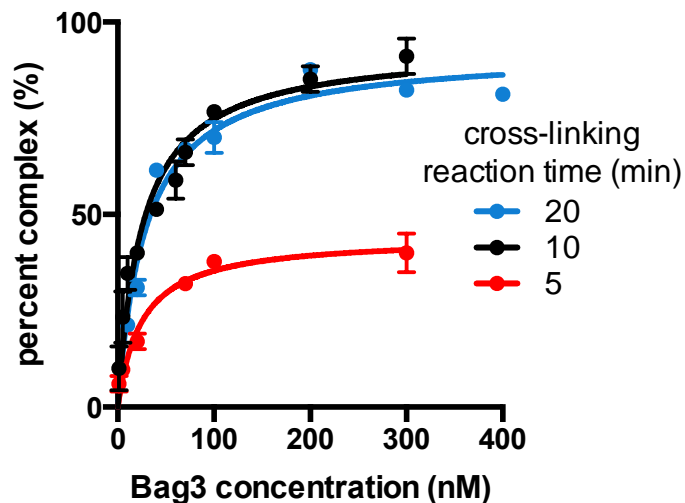

**Table S-5.** Dependence of measured  $K_d$  of Hsp70-488-Bag3 interaction on cross-linking reaction time using 1% formaldehyde.

| Cross-linking reaction time (min) | $K_d, \text{Hsp70-Bag3}$ (nM) |
|-----------------------------------|-------------------------------|
| 5                                 | $25 \pm 8$                    |
| 10                                | $25 \pm 5$                    |
| 20                                | $29 \pm 6$                    |

**Figure S-4.** Calorimetric isothermal-titration measurement of FITC-lysozyme interaction with anti-lysozyme.

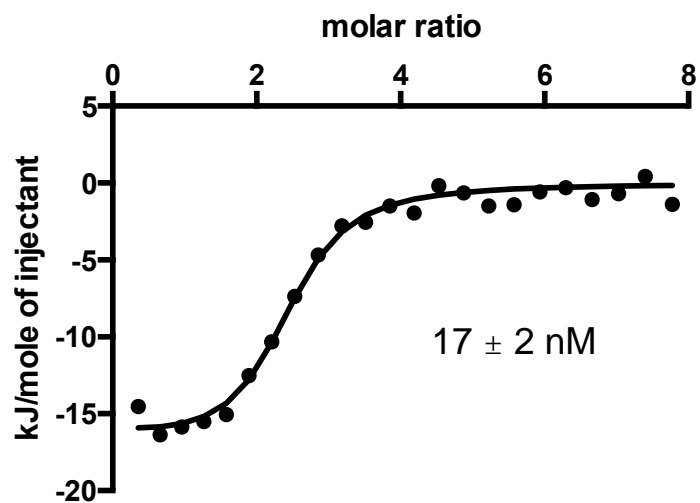



**Figure S-5.** FCPIA data of small molecule Hsp70-Bag3 inhibitors JG-98, JG-231 and JG-311. Error bars are range of two trials.

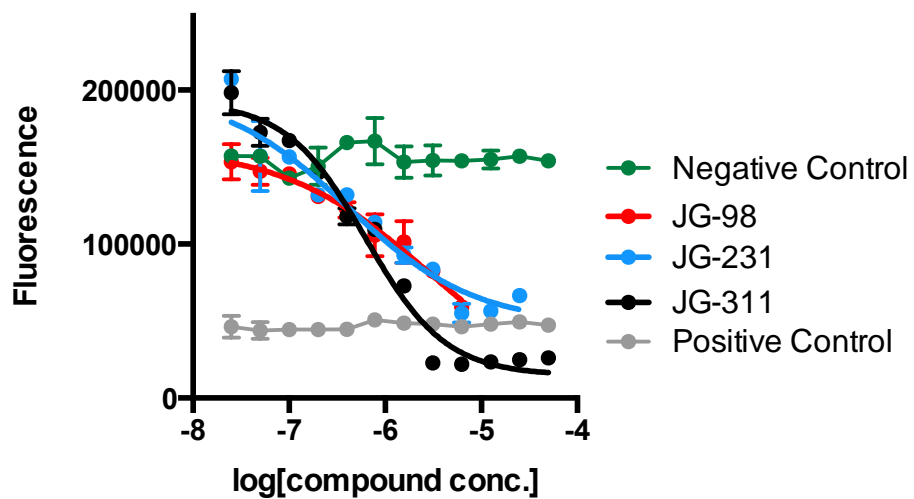

Supplement: NIHMS829357-supplement-supporting.pdf [file NIHMS829357-supplement-supporting.pdf]
